# Supplementary material
Source: publisher figshare collection journal article supplement (https://gsapubs.figshare.com/ndownloader/files/40896428)
Supplement: Supplementary file 1 [file 40896428]

## Sheet: Major element and CIPW-norm
	Natural glassy inclusions
	LHR8	LHR8	LHR9A	LHR11	LHR11	LHR9	LHR9	LHR9	LHR9	LHR9	LHR9	LHR9	LHR9	LHR9	LHR9	LHR11
	1	2	4	5	6	7	8	9	10	11	12	13	14	15	16	17
Comment	Glass + bubble	Glass + bubble	Glass + bubble	Glass + bubble	Glass + bubble	Glass + Apatite	Glass + Apatite	Glass + Apatite	Glass + bubble	Glass + Apatite	Glass + Apatite	Glass + Apatite	Glass + Apatite	Glass + Apatite	Glass	Glass + bubble
SiO2	77.1164	76.0042	77.7916	79.1322	77.315	77.9108	79.0627	78.0895	78.2385	76.7291	76.9178	76.9774	77.7618	78.1292	78.8939	78.5662
TiO2	0.585	0.009	0.0482	0	0.04	0.0015	0	0.0135	0	0.0767	0.0331	0.0241	0	0	0	0.0573
Al2O3	12.0491	11.6465	11.892	11.9411	11.6465	11.9411	11.892	11.509	12.1572	12.7071	12.4419	12.4518	12	11.9902	11.9804	10.9591
FeO	0.7565	0.8208	0.8421	0.7604	0.6518	0.5093	0.6449	0.4941	0.9074	0.591	0.7369	0.6457	0.6161	0.6432	0.7276	0.5612
MnO	0.06	0.089	0	0.0358	0.0089	0.0712	0	0.0623	0.08	0	0.0178	0	0.04	0	0	0
MgO	0.29	0.0907	0.0317	0.0422	0.0356	0.0103	0.0112	0.0356	0	0.0392	0.0626	0.027	0.0158	0.0597	0.0159	0
CaO	0.0579025	0.0820705	0.0526661	0.126378	0.150647	0.05035	0.09063	0.0645487	0.0722019	0.321938	0.163134	0.131514	0.132723	0.109562	0.025175	0.0900258
Na2O	2.09244	1.82924	1.2502	1.7108	1.69764	2.09244	2.2372	2.51356	1.45339	1.6042	1.5942	1.54169	1.38101	1.62329	2.80308	2.05296
K2O	7.15182	6.8508	8.31438	7.07916	6.93384	7.266	7.39056	7.2141	8.22096	8.62578	8.44932	8.7192	8.5635	8.57388	6.96498	7.266
P2O5	0	0	0	0.0727	0	0.015	0	0.0499	0	0.1883	0.1101	0.0637	0.1289	0.1111	0.0159	0
Total	100.159	97.4224	100.223	100.901	98.4799	99.8665	101.329	100.046	101.13	100.883	100.527	100.582	100.64	101.24	101.427	99.5528
ASI	1.06739	1.13	1.06	1.11	1.12	1.05	0.99	0.95	1.05	1	1.03	1.09	1.01	1.01	0.97	0.960867
AI	0.00848009	0.0123016	0.00817759	0.0142342	0.0134281	0.00623131	0.00205521	-0.00425657	0.00841819	0.00711385	0.00657598	0.00466227	0.00447527	0.000384213	-0.0016394	-0.00278465
FeO+MgO	1.0465	0.9115	0.8738	0.8026	0.6874	0.5196	0.6561	0.5297	0.9074	0.6302	0.7995	0.6727	0.6319	0.7029	0.7435	0.5612
H2O by diff	anhydrous	2.56	anhydrous	anhydrous	1.49	0.15	anhydrous	anhydrous	anhydrous	anhydrous	anhydrous	anhydrous	anhydrous	anhydrous	anhydrous	0.5
H2O by Raman	not measured	1.3	0.3	0.3	1.3	not measured	not measured	not measured	not measured	not measured	not measured	not measured	not measured	not measured	not measured	0.4
Q	36.7743	38.0789	37.8709	41.2929	40.005	37.3655	37.0145	36.6341	37.3402	33.7316	34.5689	33.9756	36.4613	35.325	35.7976	39.1283
Or	42.2646	40.4857	49.1349	41.8352	40.9764	42.9393	43.6754	42.6326	48.5828	50.9751	49.9323	51.5272	50.6071	50.6684	41.1604	42.9393
Ab	17.7055	15.4784	10.5788	14.4762	14.3649	17.7055	18.9305	19.0325	12.2981	13.5742	13.4896	13.0453	11.6857	13.7357	22.8439	15.9149
An	0.287254	0.407151	0.261276	0.152468	0.747359	0.151884	0.449614		0.358193	0.368143	0.0907108	0.236686	0	0
C	0.760214	1.07248	0.73978	1.40808	1.0744	0.578213	0.0470262		0.736255	0.596234	0.640231	0.390806	0.525721	0.105633
Di															0.0187363	0.398121
Hy	1.25686	1.8838	1.54569	1.56801	1.23605	1.09082	1.21212	1.08955	1.81503	1.0562	1.48752	1.21314	1.24508	1.3298	1.36576	0.724094
Il	1.11117	0.017095	0.0915531		0.0759777	0.00284916		0.0256425		0.145687	0.0628716	0.0457766				0.108838
Ap				0.168504		0.0347671		0.115659		0.436443	0.25519	0.147644	0.298765	0.257508	0.0368531
Table S2: Major element composition (corrected for alkalis) and CIPW-norms (wt.%) of glassy melt inclusions.

## Sheet: G51097
Carvalho, B.B., et al., 2023, Revealing the link between A-type granites and hottest melts from residual metasedimentary crust: Geology, https://doi.org/10.1130/G51097.1
